# Supplementary material
Source: publisher figshare collection journal article supplement (https://acs.figshare.com/ndownloader/files/14343095)
Supplement: Supplementary file 1 [file 14343095]

**- Supporting Information –**

**Poly(ethylene glycol) with Multiple Aldehyde Functionalities Opens  
up a Rich and Versatile Post-Polymerization Chemistry**

*Jan Blankenburg<sup>‡§</sup>, Kamil Maciol<sup>‡</sup>, Christoph Hahn<sup>‡</sup>, Holger Frey<sup>‡\*</sup>*

<sup>‡</sup> Institute of Organic Chemistry, Johannes Gutenberg University Mainz, Duesbergweg 10-14,  
55128 Mainz, Germany

<sup>§</sup> Graduate School Materials Science in Mainz, Staudinger Weg 9, 55128 Mainz, Germany

<sup>\*</sup>(H.F.) E-Mail: hfrey@uni-mainz.de

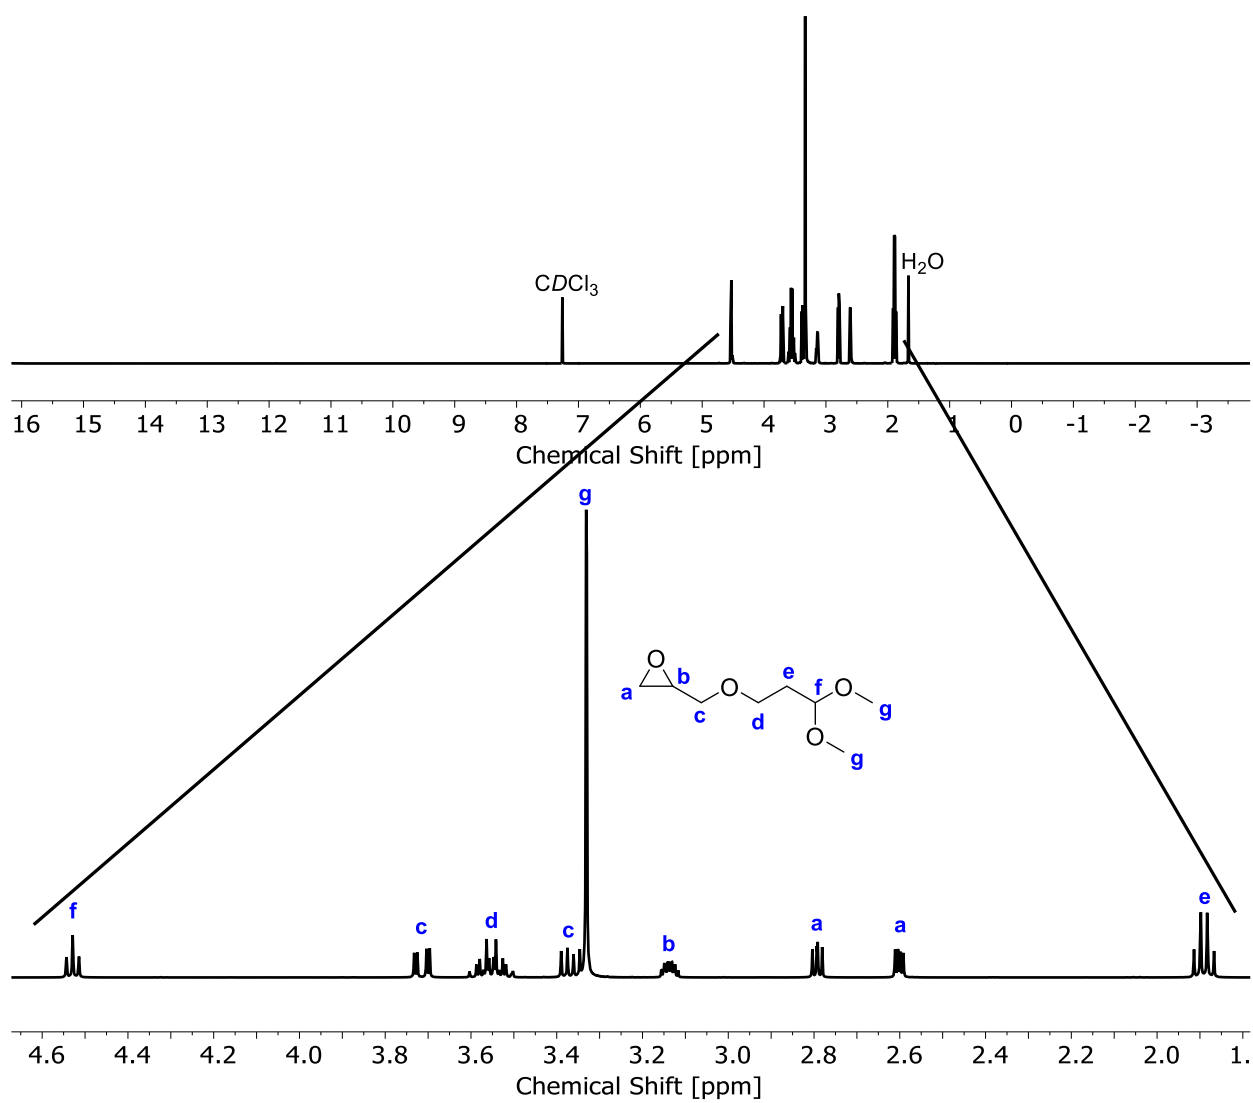

Figure S1.  $^1\text{H}$  NMR spectrum (400 MHz,  $\text{CDCl}_3$ ) of DMPGE.

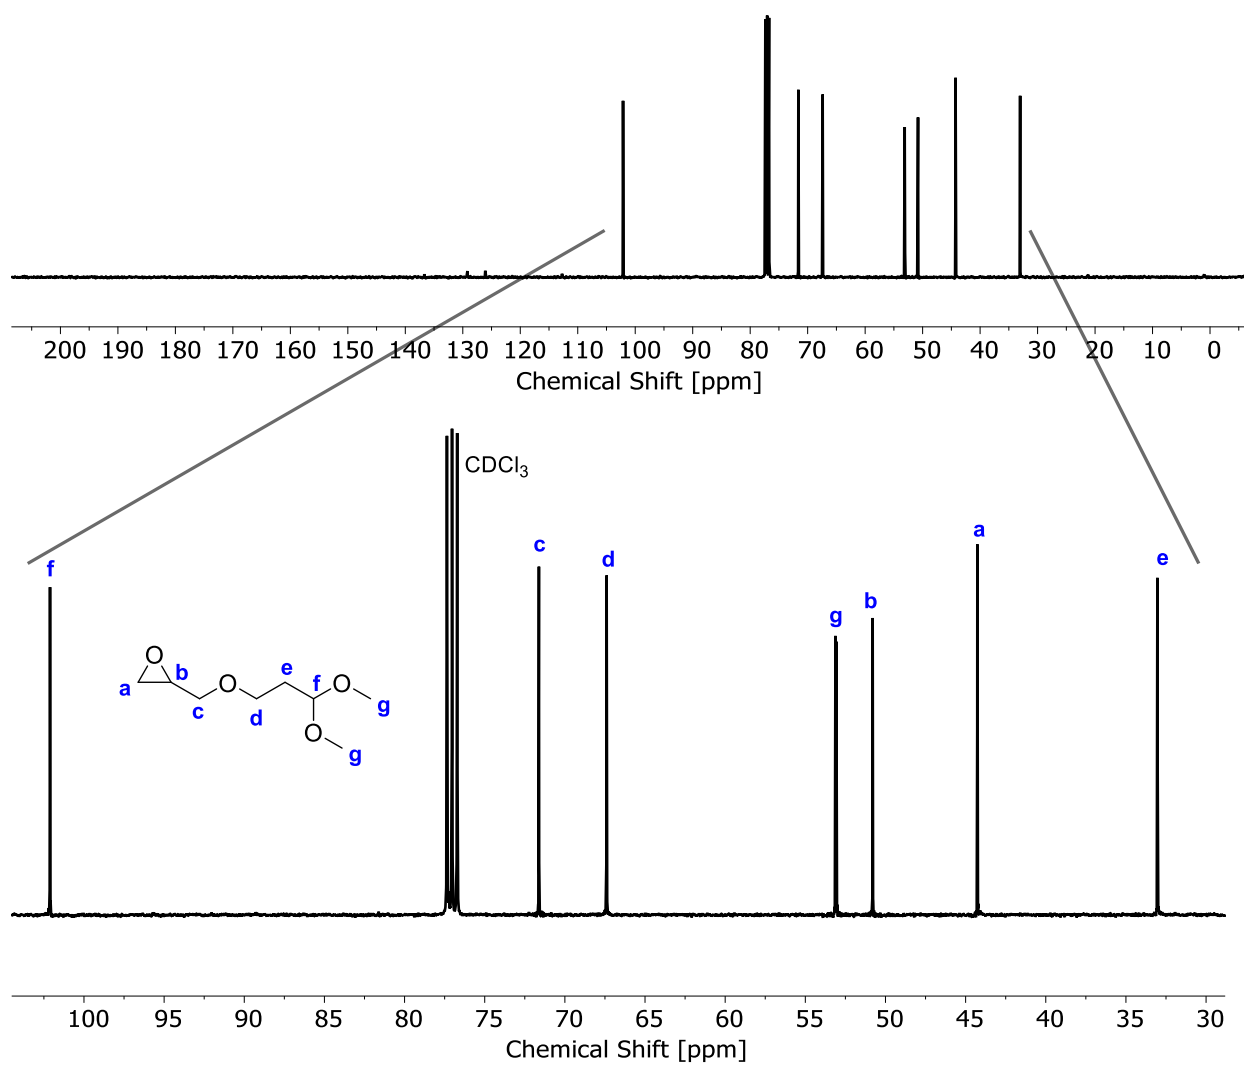

Figure S2.  $^{13}\text{C}$  NMR spectrum (100 MHz,  $\text{CDCl}_3$ ) of DMPGE.

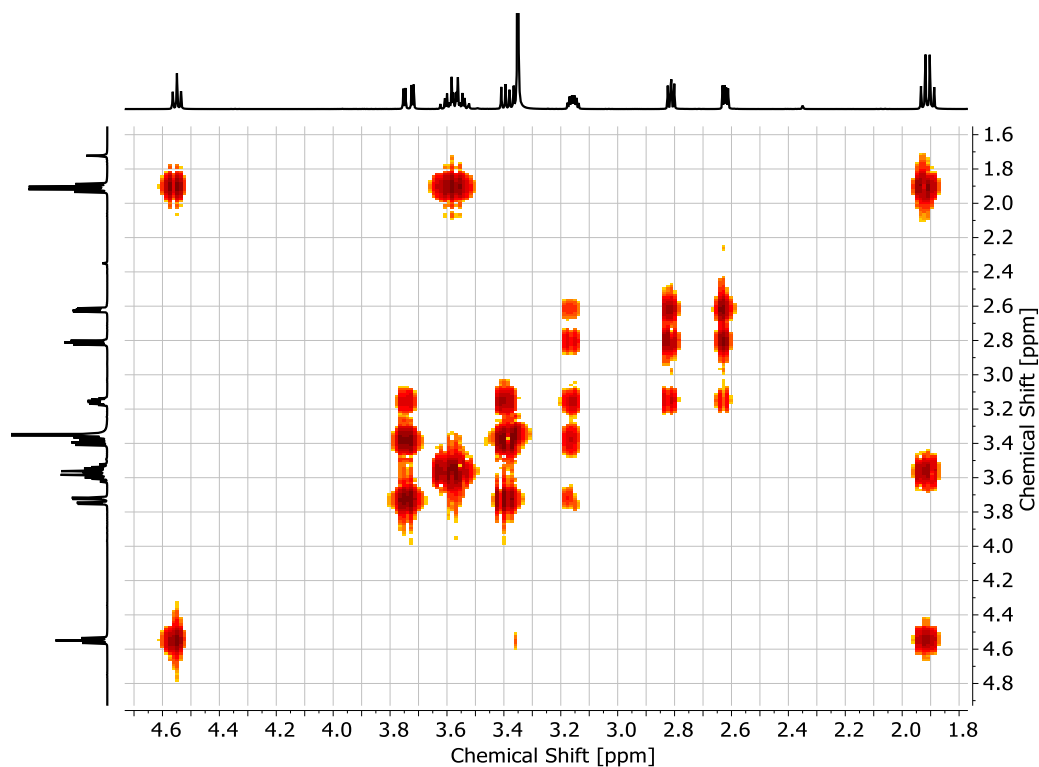

Figure S3.  $^1\text{H}$ ,  $^1\text{H}$  COSY NMR spectrum (400 MHz,  $\text{CDCl}_3$ ) of DMPGE.

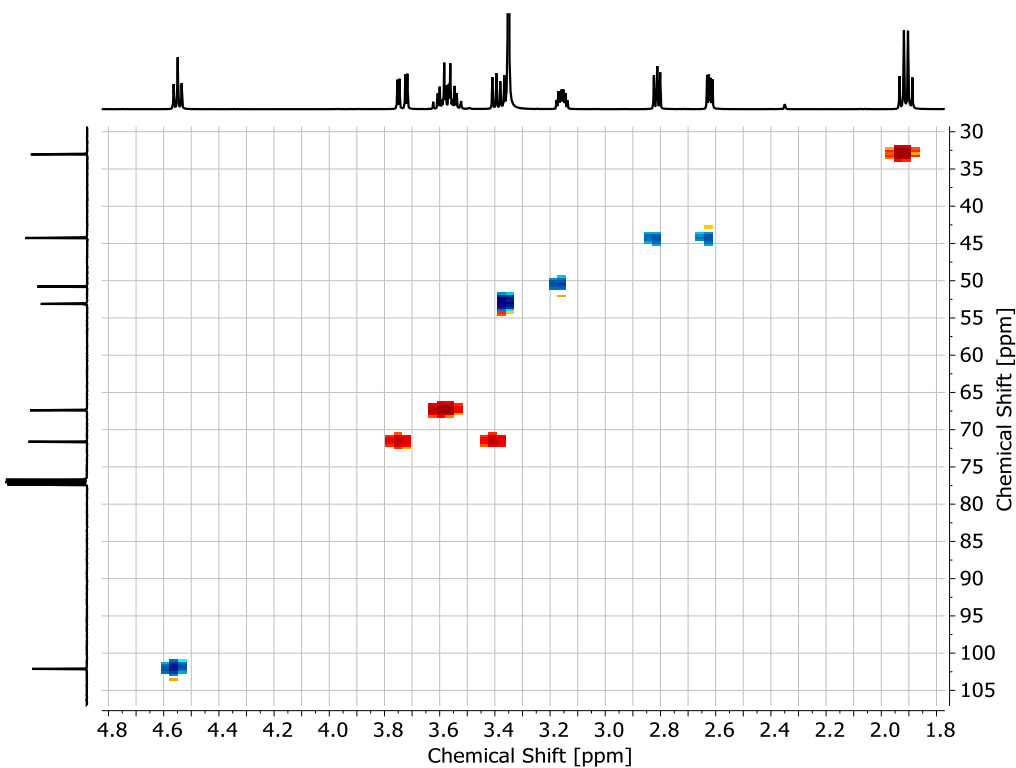

Figure S4.  $^1\text{H}$ ,  $^{13}\text{C}$  HSQC NMR spectrum ( $\text{CDCl}_3$ ) of DMPGE.

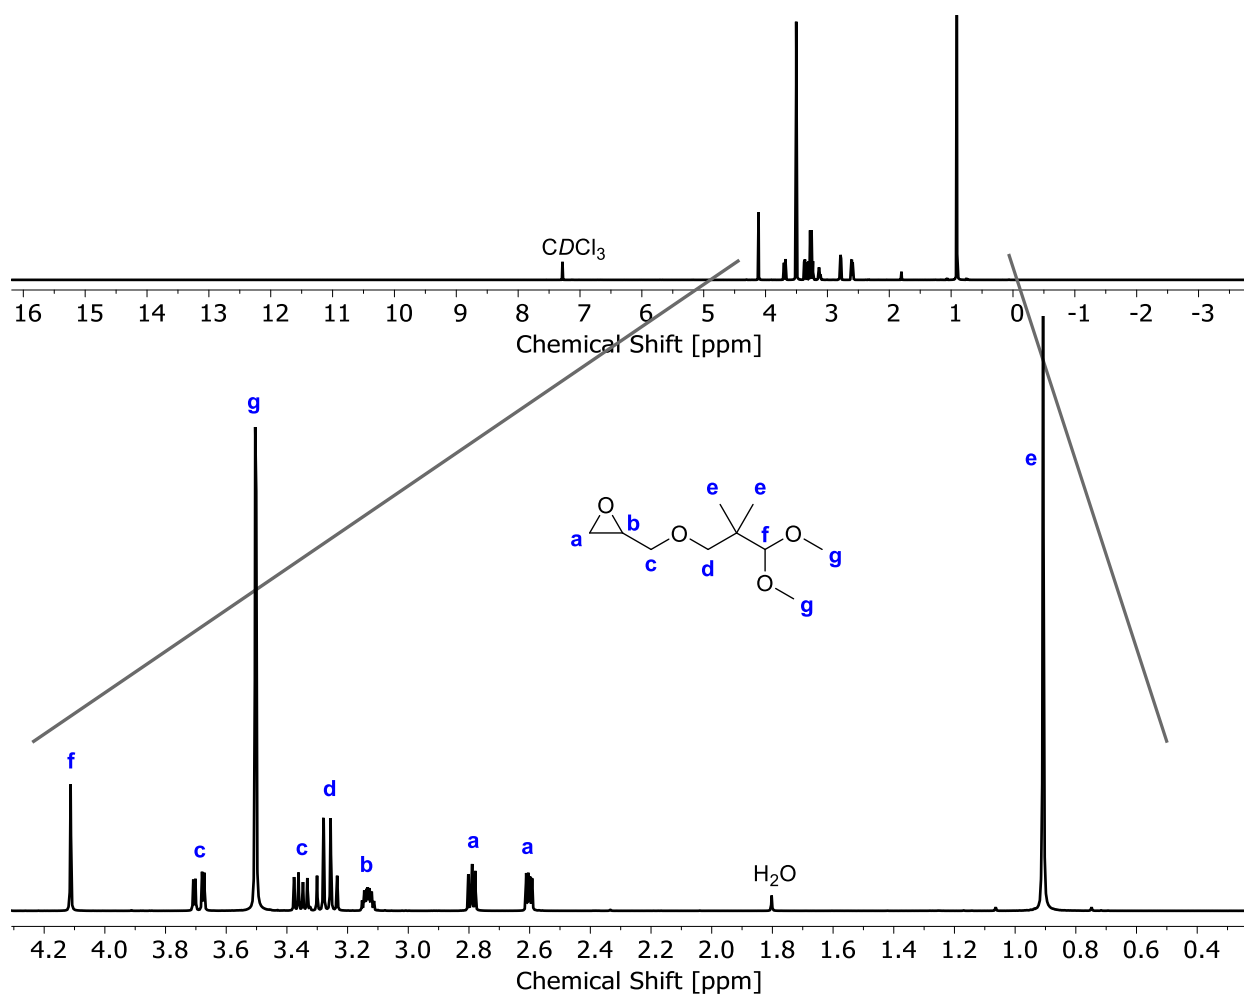

Figure S5.  $^1\text{H}$  NMR spectrum (400 MHz,  $\text{CDCl}_3$ ) of DDPGE.

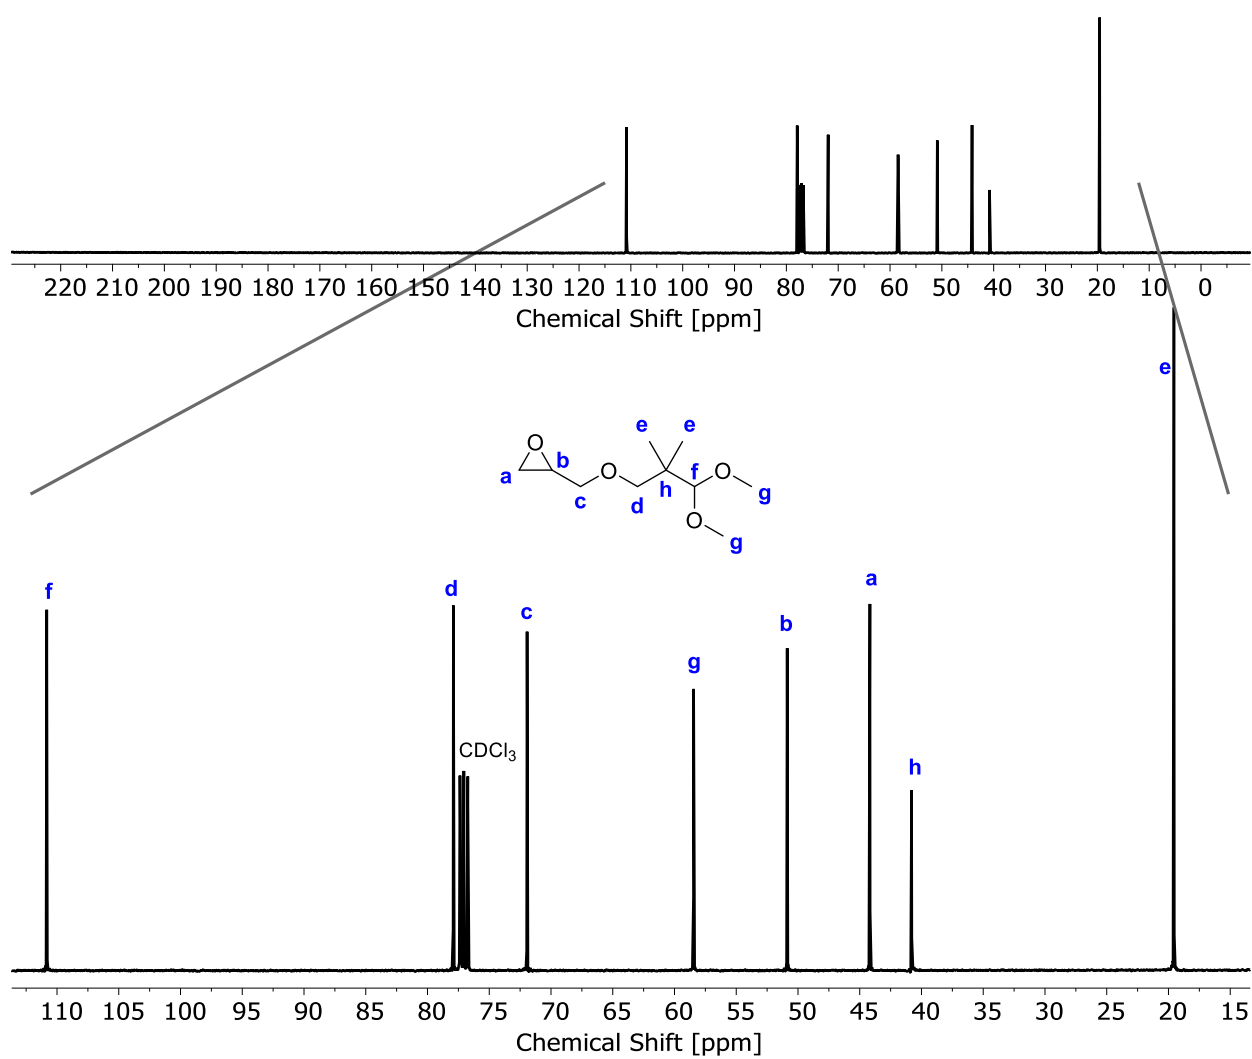

Figure S6.  $^{13}\text{C}$  NMR spectrum (100 MHz,  $\text{CDCl}_3$ ) of DDPGE.

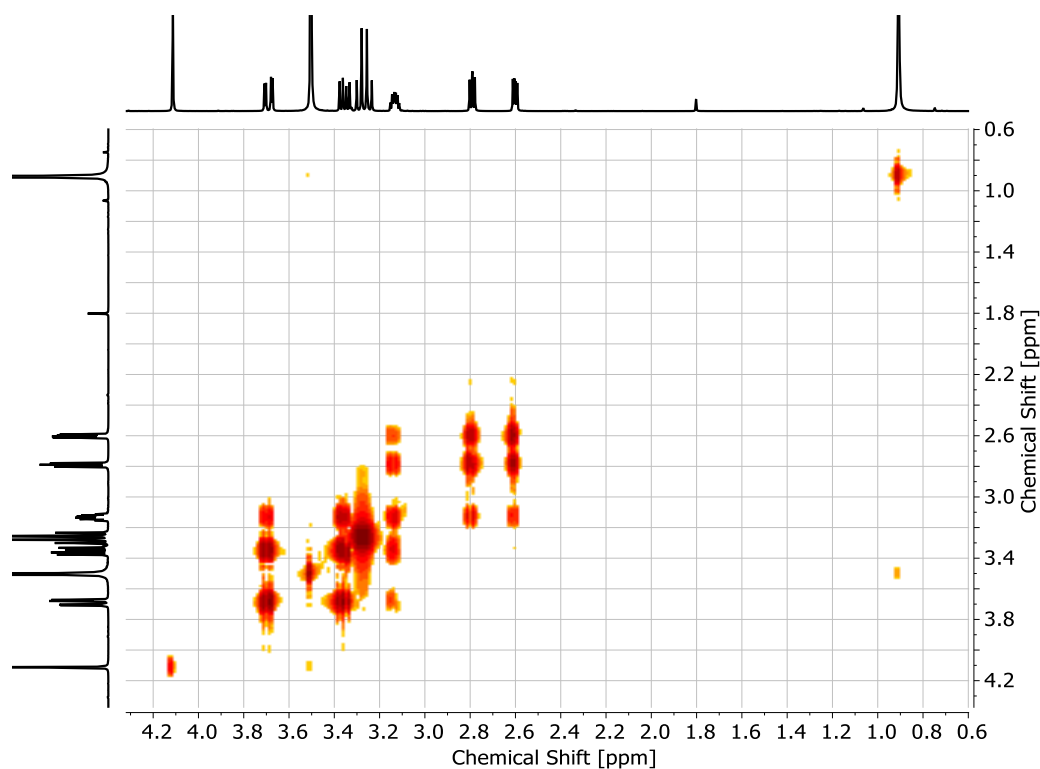

Figure S7.  $^1\text{H}$ ,  $^1\text{H}$  COSY NMR spectrum (400 MHz,  $\text{CDCl}_3$ ) of DDPGE.

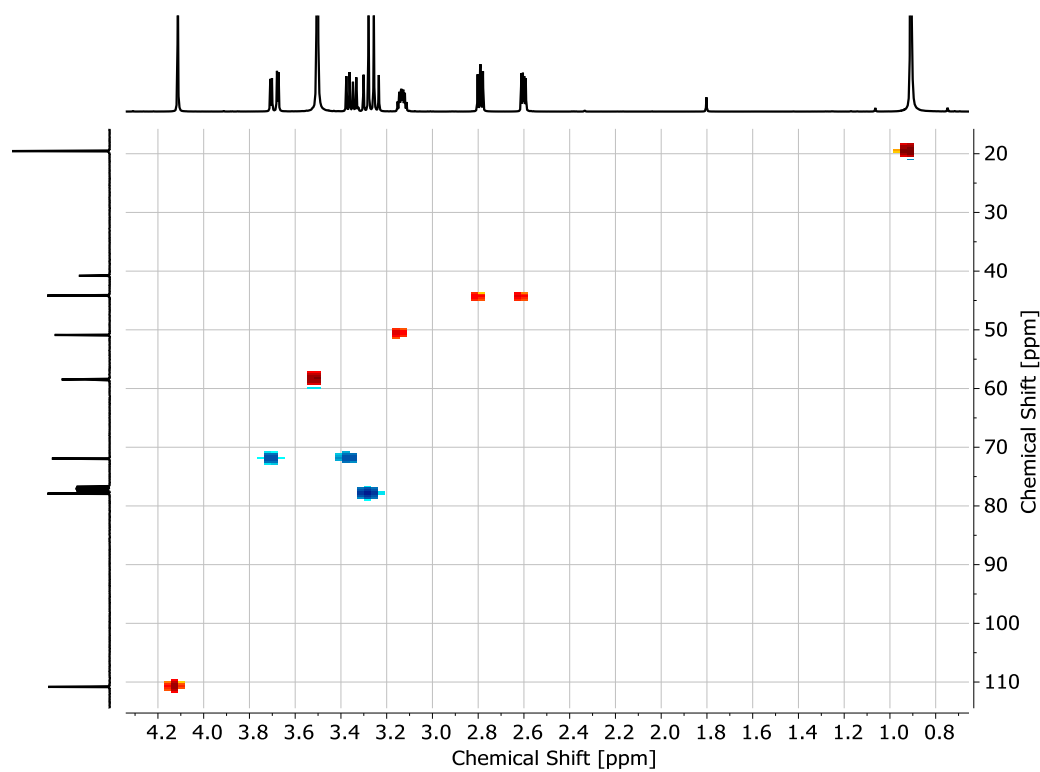

Figure S8.  $^1\text{H}$ ,  $^{13}\text{C}$  HSQC NMR spectrum ( $\text{CDCl}_3$ ) of DDPGE.

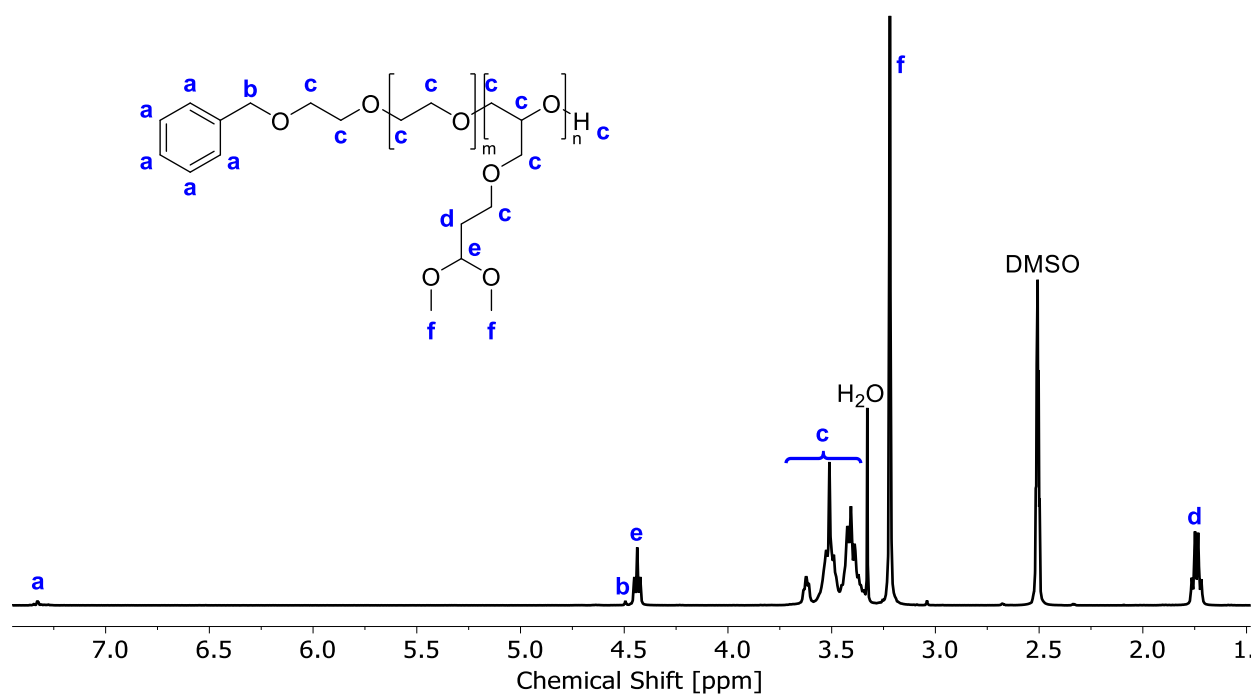

Figure S9. <sup>1</sup>H NMR spectrum (400 MHz, DMSO-*d*<sub>6</sub>) of P(EO<sub>42</sub>-co-DMPGE<sub>56</sub>).

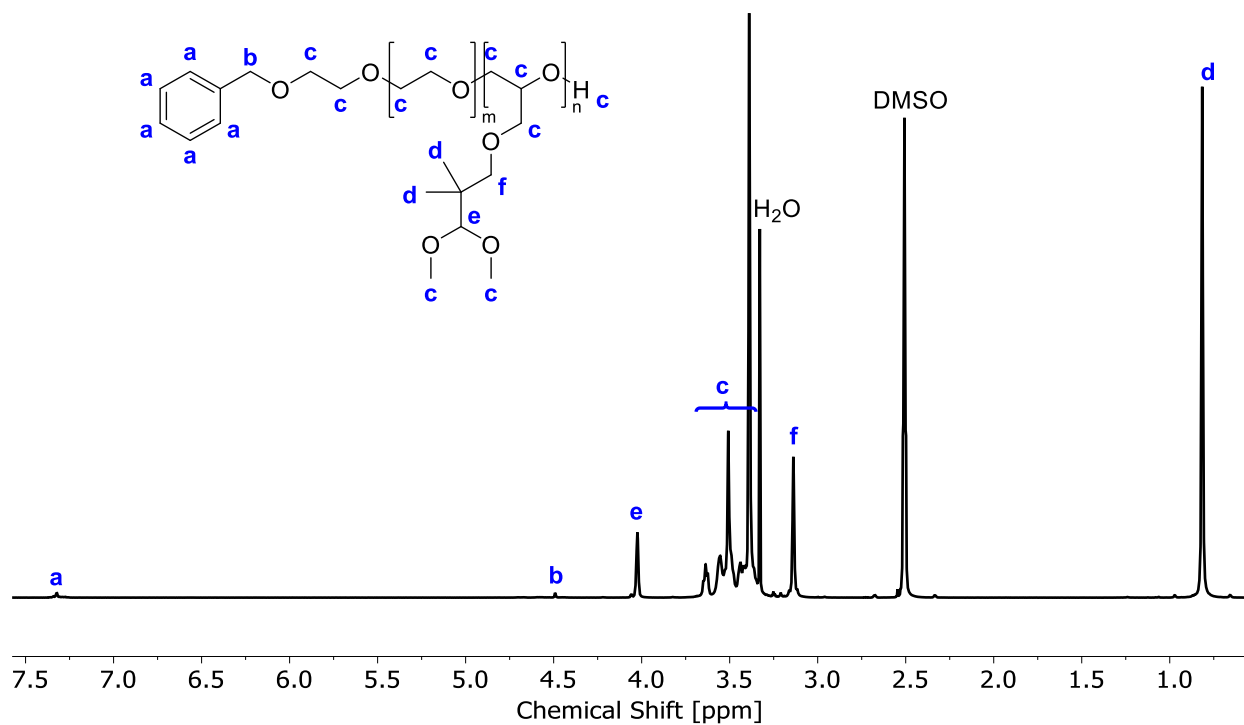

Figure S10. <sup>1</sup>H NMR spectrum (400 MHz, DMSO-*d*<sub>6</sub>) of P(EO<sub>39</sub>-co-DDPGE<sub>43</sub>).



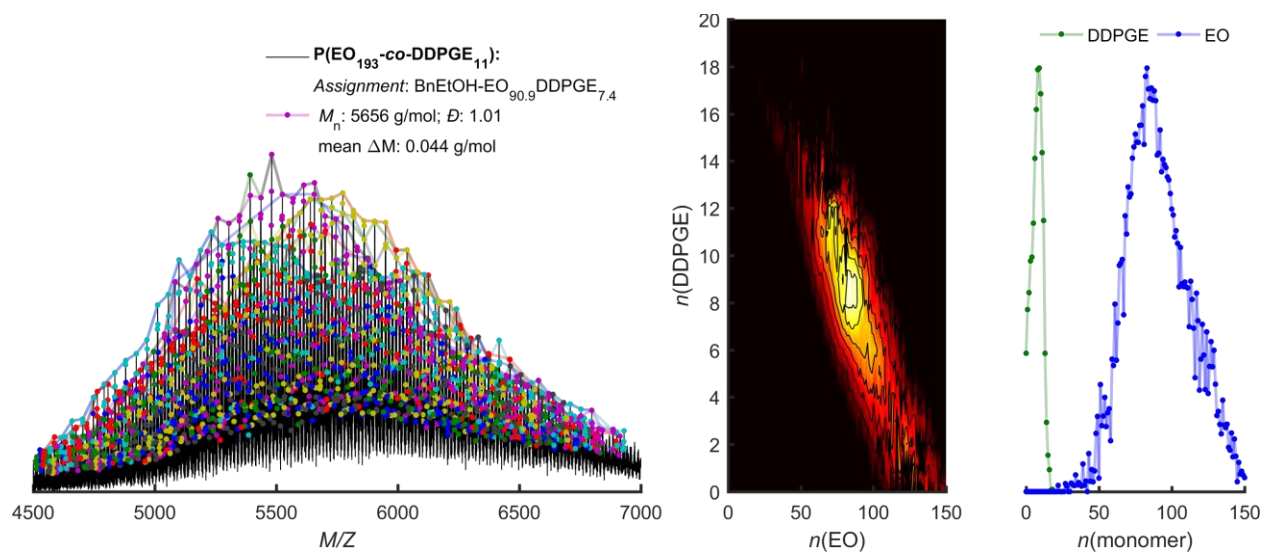

Figure S11. MALDI TOF spectra of  $P(\text{EO}_{193}\text{-co-DDPGE}_{11})$  copolymers with peak assignment and extracted copolymer composition distribution. A detailed explanation of the evaluation procedure leading to the different signal series can be found elsewhere.<sup>1</sup>

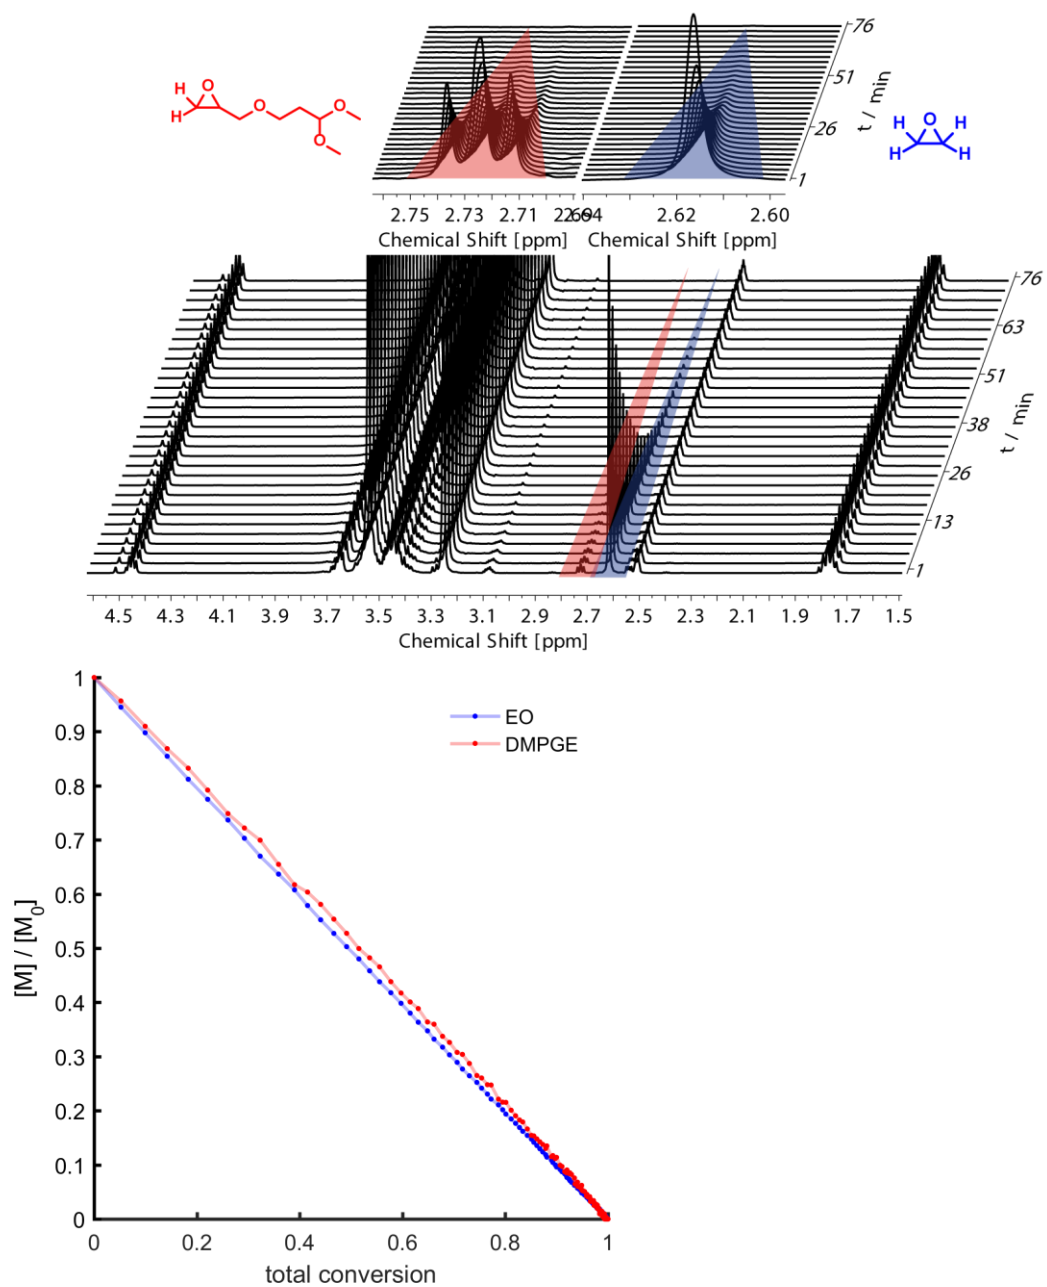

Figure S12. Evaluated signals in  $^1\text{H}$  NMR copolymerization kinetics experiment of EO and DMPGE (top); normalized concentration as a function of total conversion (bottom).

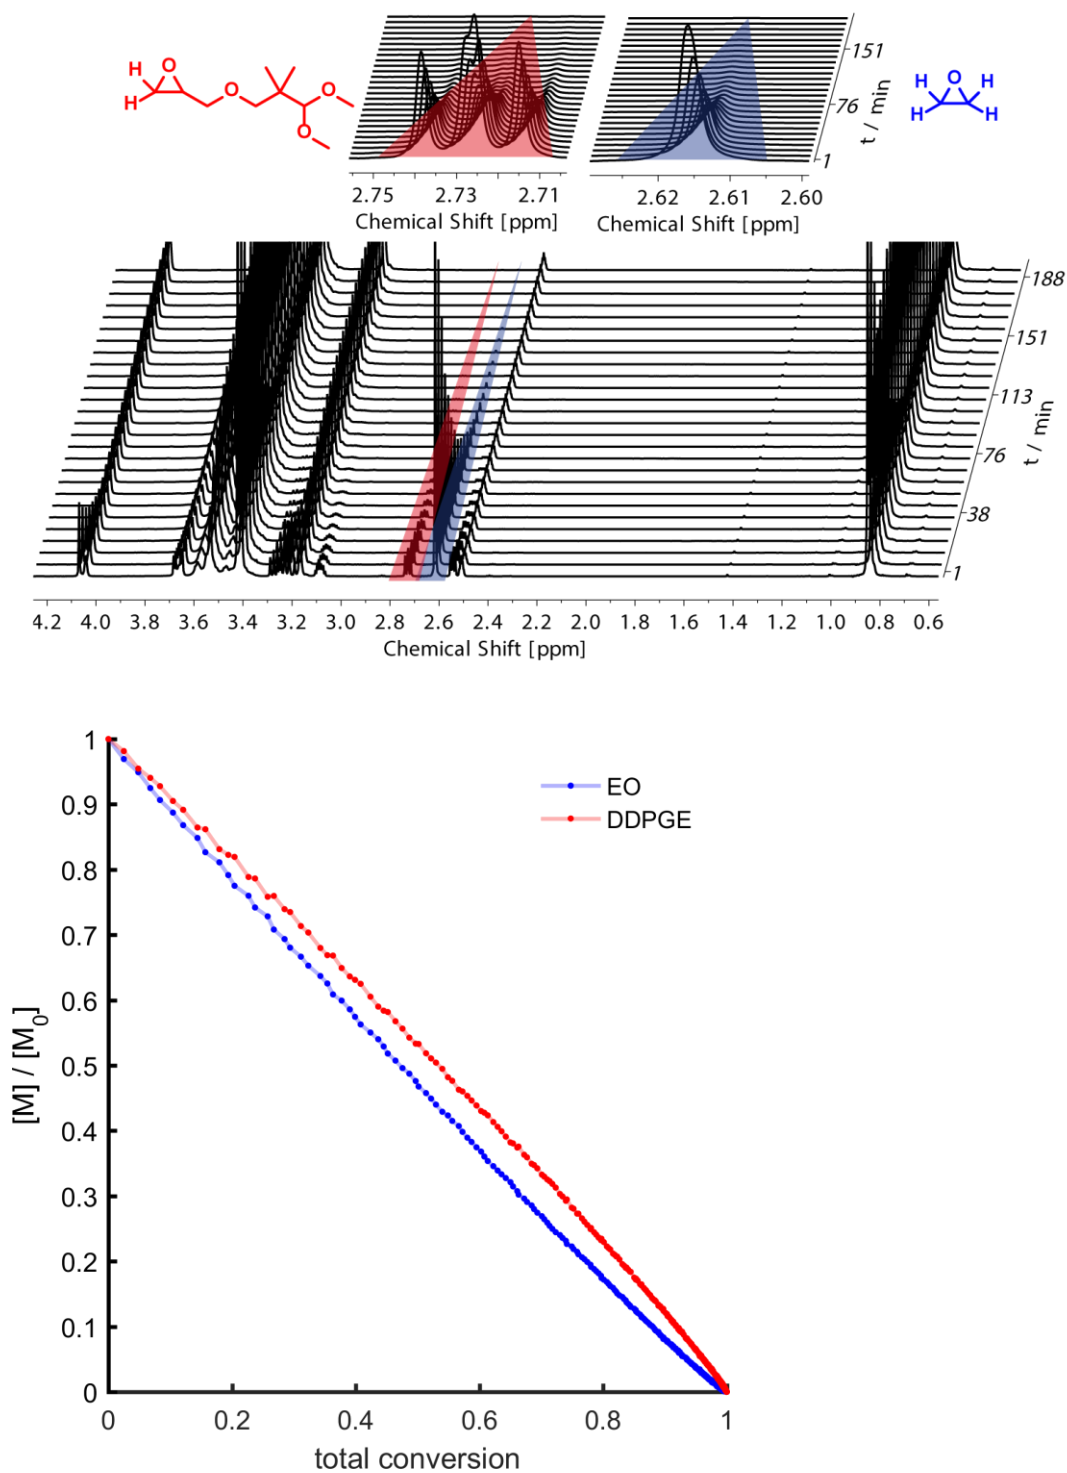

Figure S13. Evaluated signals in  $^1\text{H}$  NMR copolymerization kinetics experiment of EO and DDPGE (top); normalized concentration as a function of total conversion (bottom).

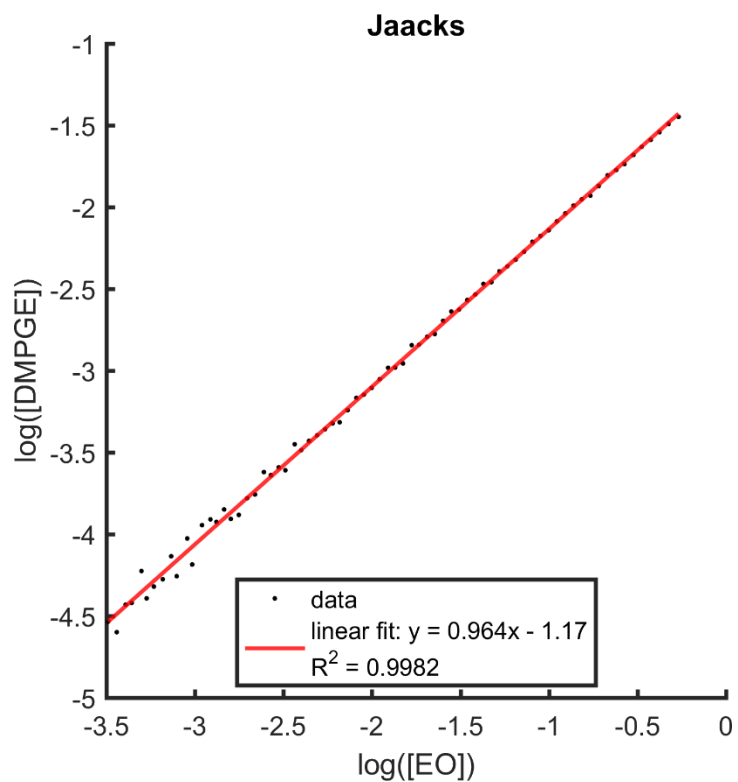

Figure S14. Jaacks-fit of copolymerization of EO and DMPGE.

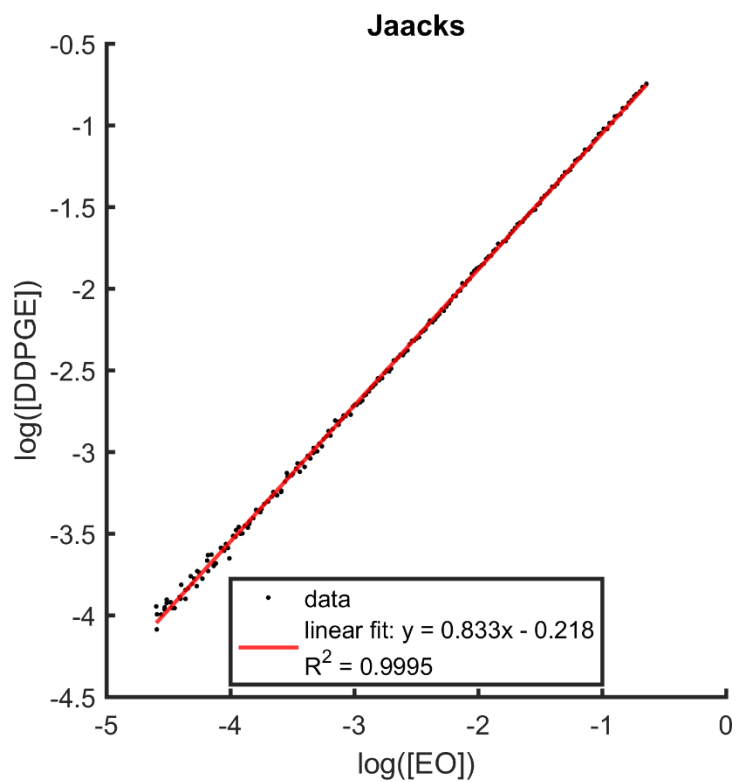

Figure S15. Jaacks-fit of copolymerization of EO and DDPGE.

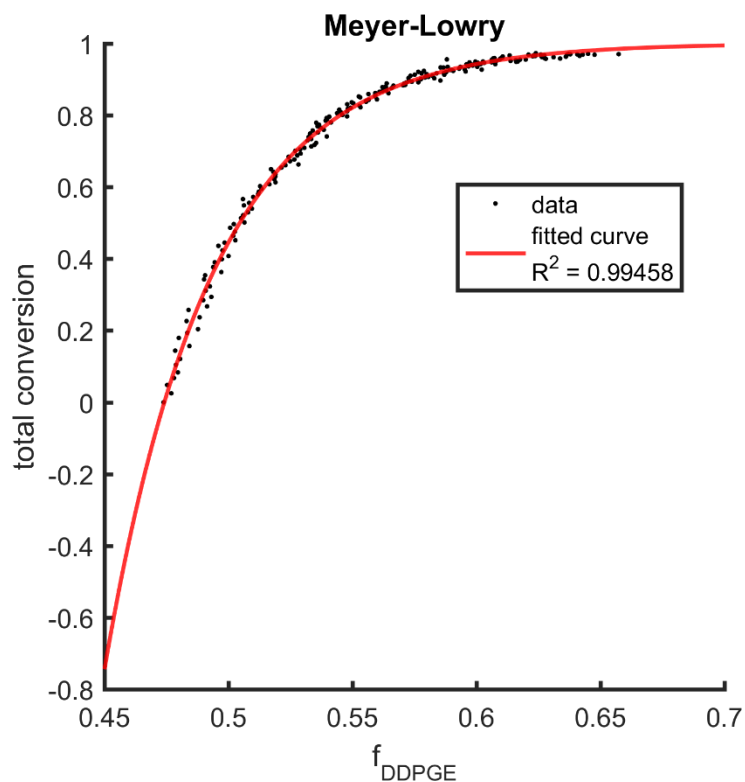

Figure S16. Meyer-Lowry fit of copolymerization of EO and DPPGE.

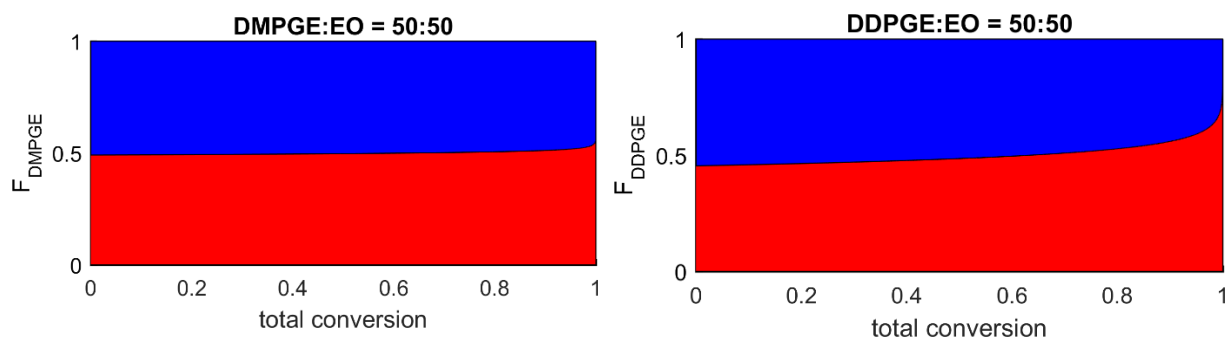

Figure S17. Simulation of the distribution of acetal functionalities for a 50:50 copolymer of EO with DMPGE (left) and DDPGE (right) in the polyether chain.

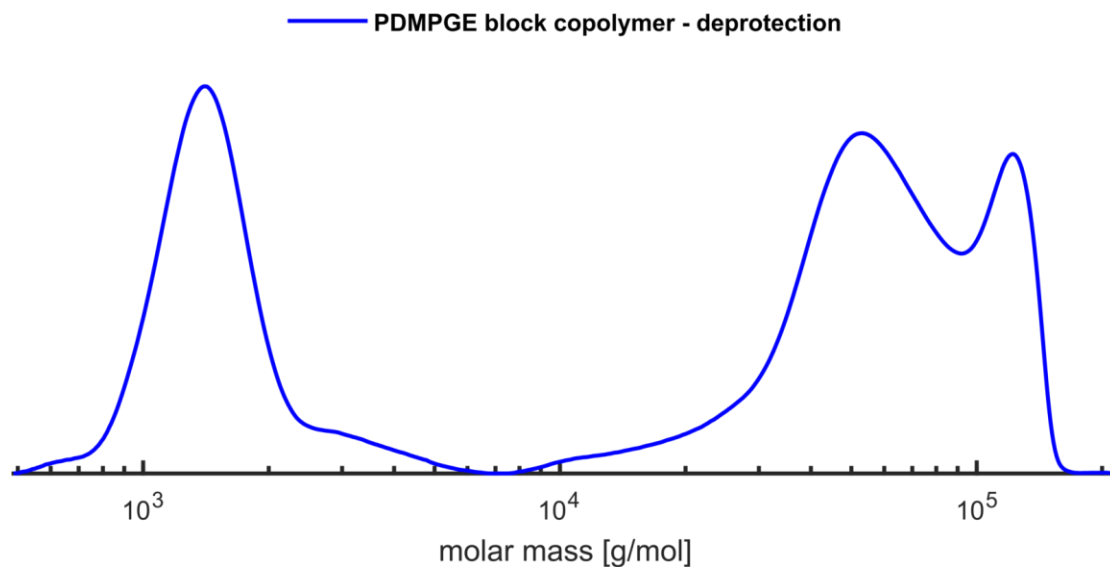

Figure S18: Crosslinking observed after deprotection of a PDMPGE block copolymer in SEC (DMF, PEG-calibration).

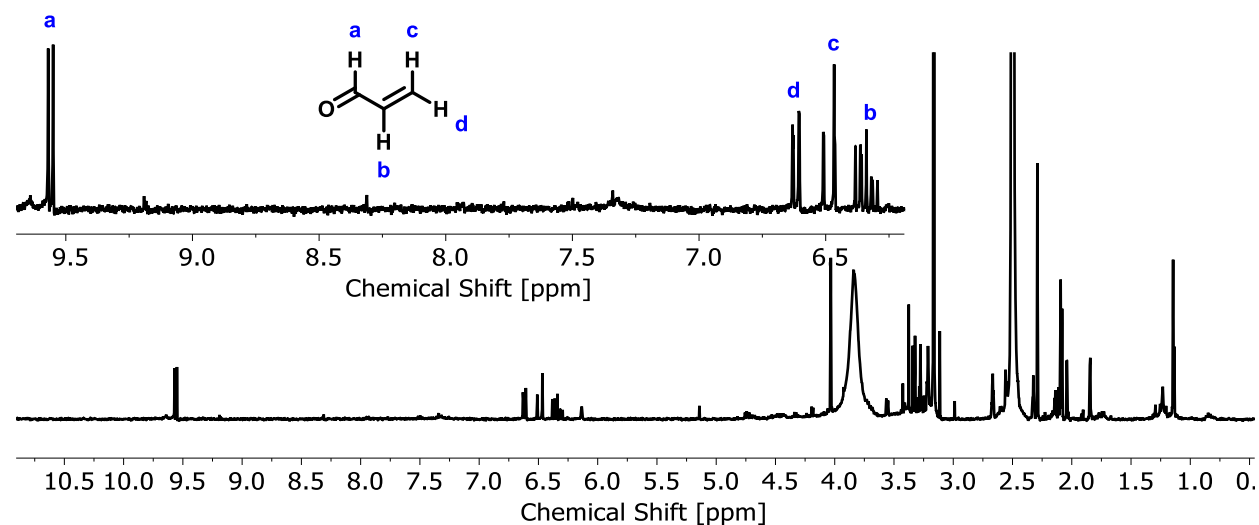

Figure S19.  $^1\text{H}$  NMR (400 MHz,  $\text{DMSO-}d_6$ ) shows the formation of acrolein at deprotection attempt of PDMPGE<sub>7</sub> homopolymer.

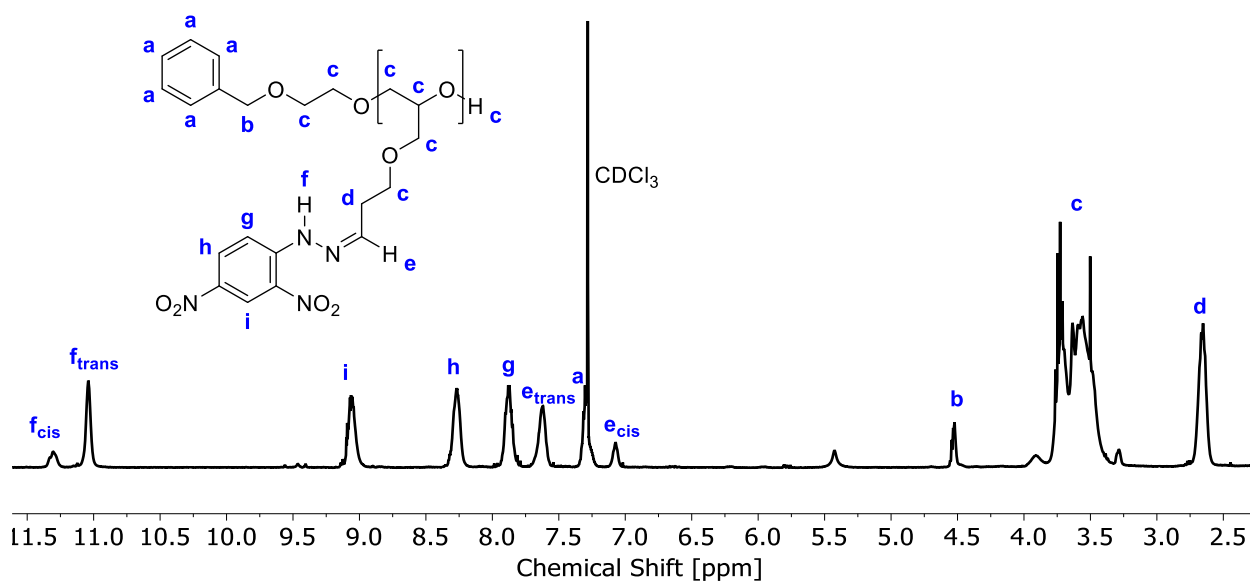

Figure S20.  $^1\text{H}$  NMR (400 MHz,  $\text{CDCl}_3$ ) of the hydrazone modified  $\text{P}(\text{DMPGE})_7$  homopolymer.

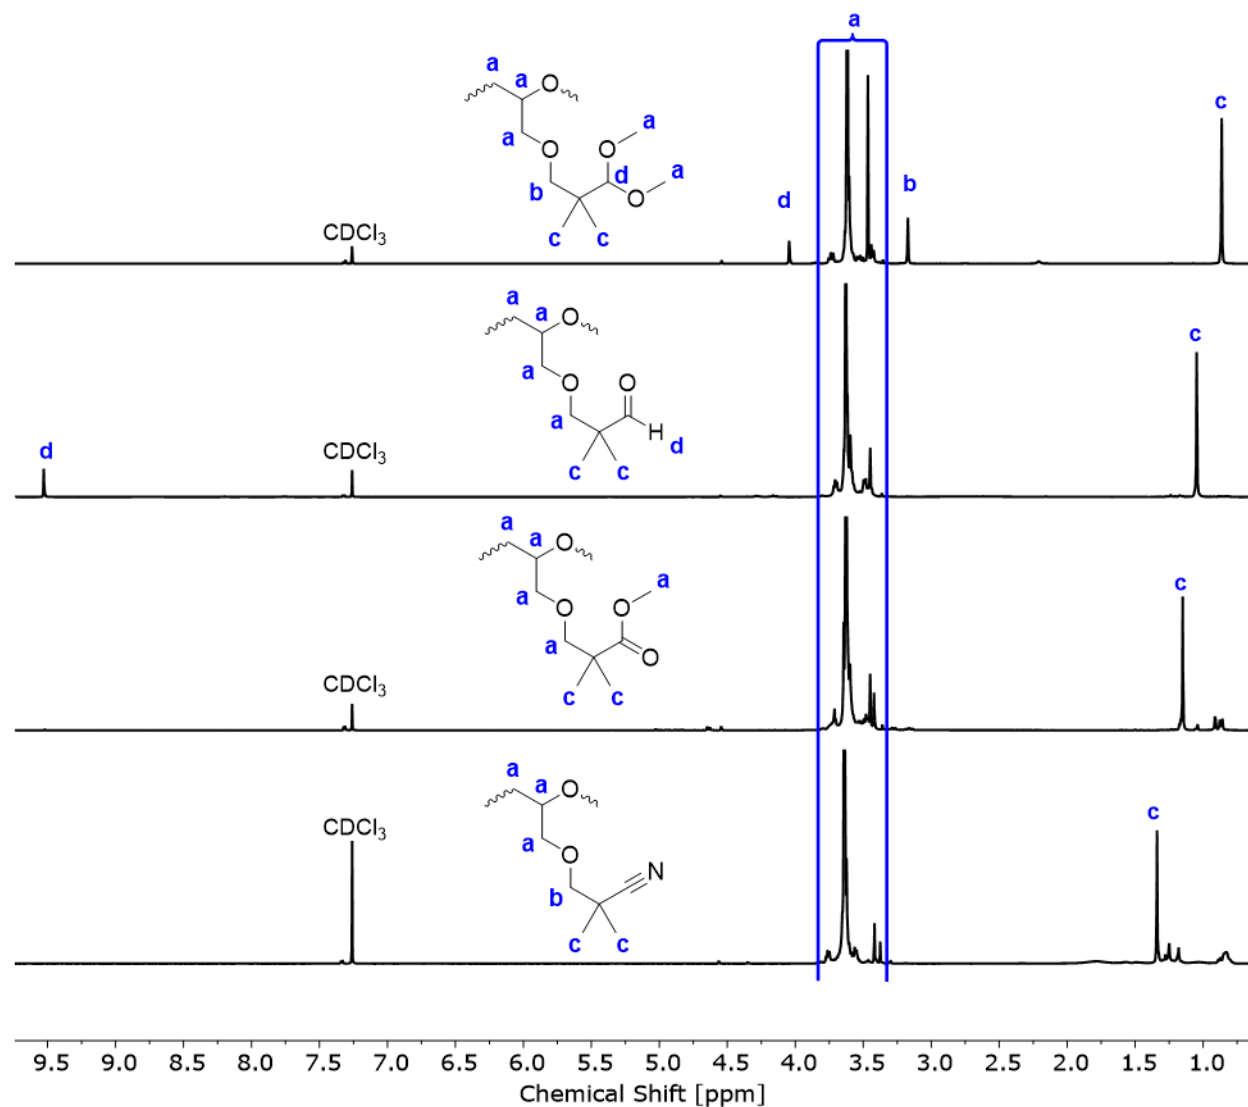

Figure S21:  $^1\text{H}$  NMR (400MHz,  $\text{CDCl}_3$ ) spectra of acetal, aldehyde, methyl ester and nitril-functional PEG.



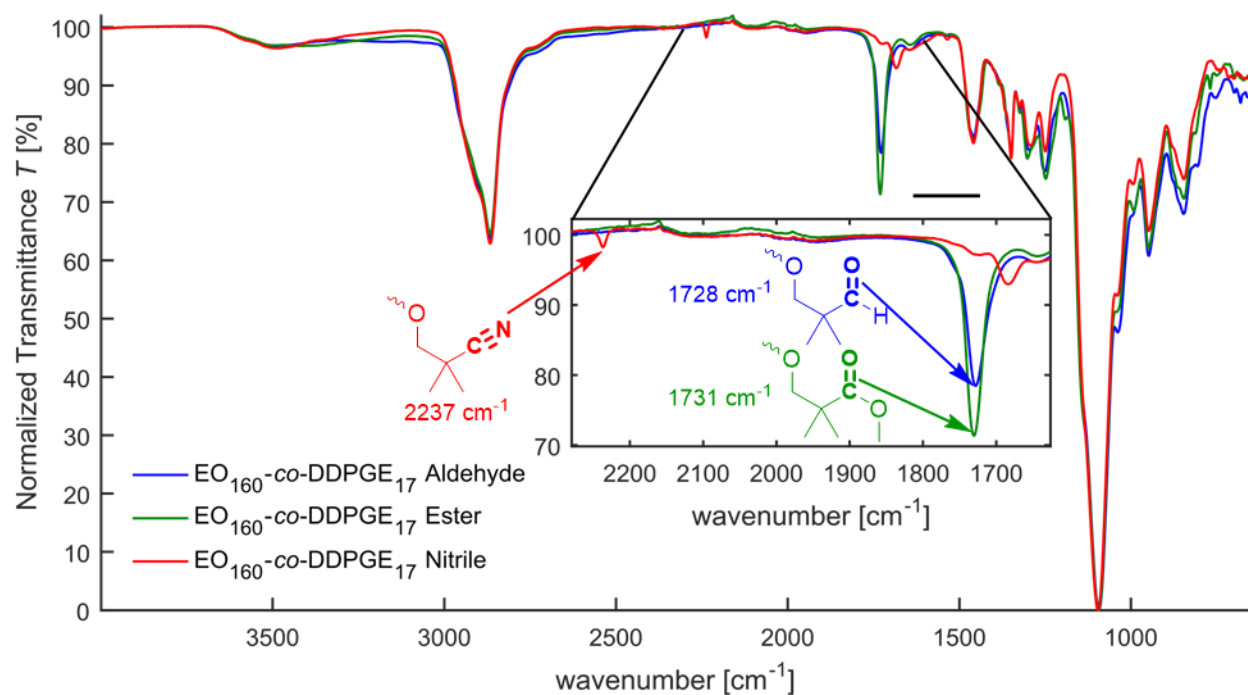

Figure S22: IR-spectra of post-polymerization reactions with assigned vibration bands.

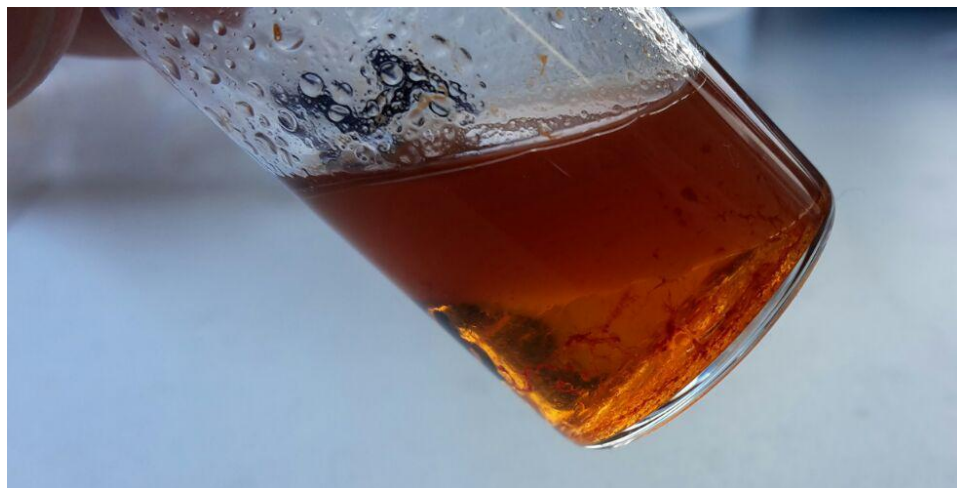

Figure S23. Positive Angeli-Rimini<sup>2</sup> chemical test of aldehyde functional PEG. The red-colored hydroxamic acid complexes could be partly transferred to the bottom dichloromethane layer.

## References (SI)

- (1) Blankenburg, J.; Wagner, M.; Frey, H. Well-Defined Multi-Amino-Functional and Stimuli-Responsive Poly(propylene oxide) by Crown Ether Assisted Anionic Ring-Opening Polymerization. *Macromolecules* **2017**, *50*, 8885–8893, DOI: 10.1021/acs.macromol.7b01324.
- (2) Gattermann, L.; Wieland, H.; McCartney, W. *Laboratory methods of organic chemistry*; Macmillan, 1937.
